# Supplementary figures and images for: The Important Role of m6A-Modified circRNAs in the Differentiation of Intramuscular Adipocytes in Goats Based on MeRIP Sequencing Analysis
Source: MDPI journal article supplement (doi:10.3390/ijms24054817), 2023-03-02

A

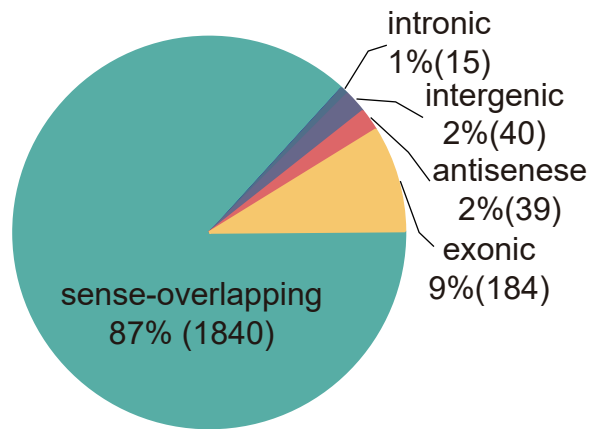

B

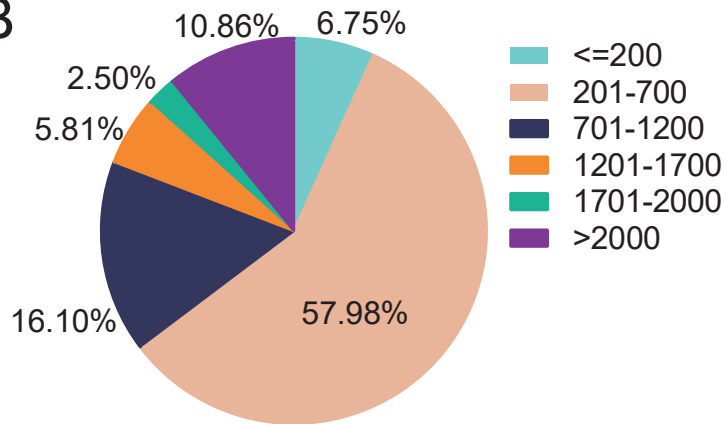

C

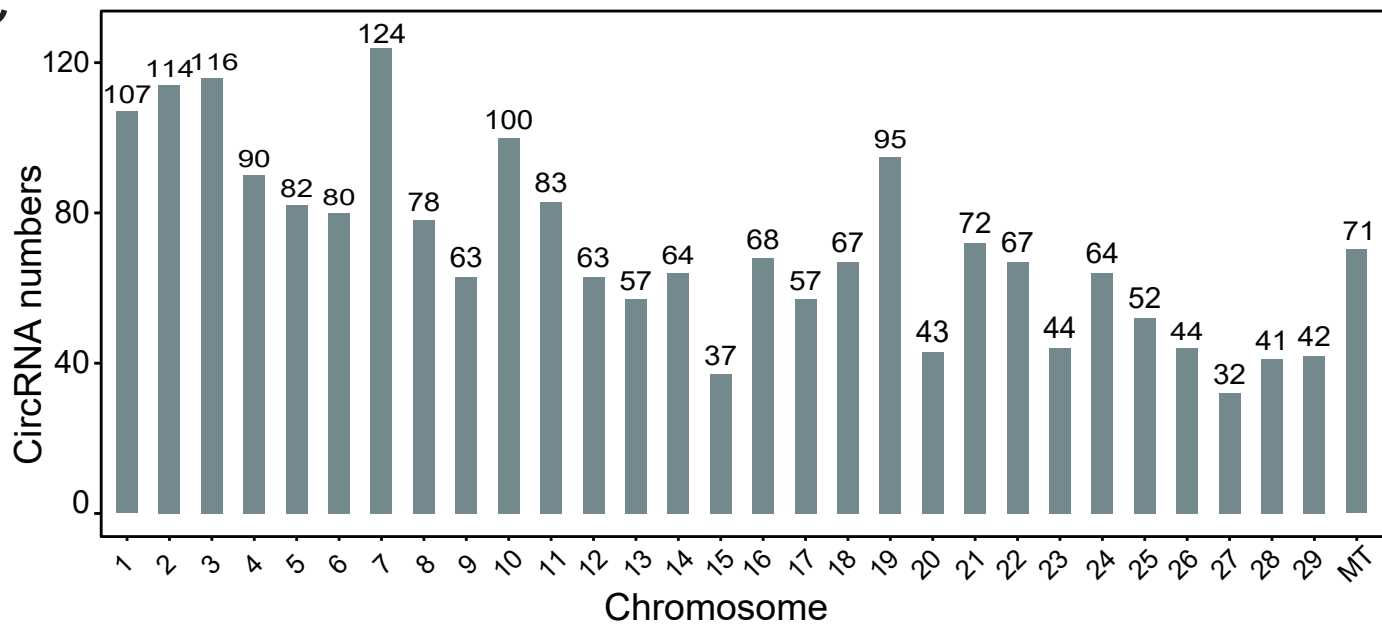

Supplement: s1 [file s1]

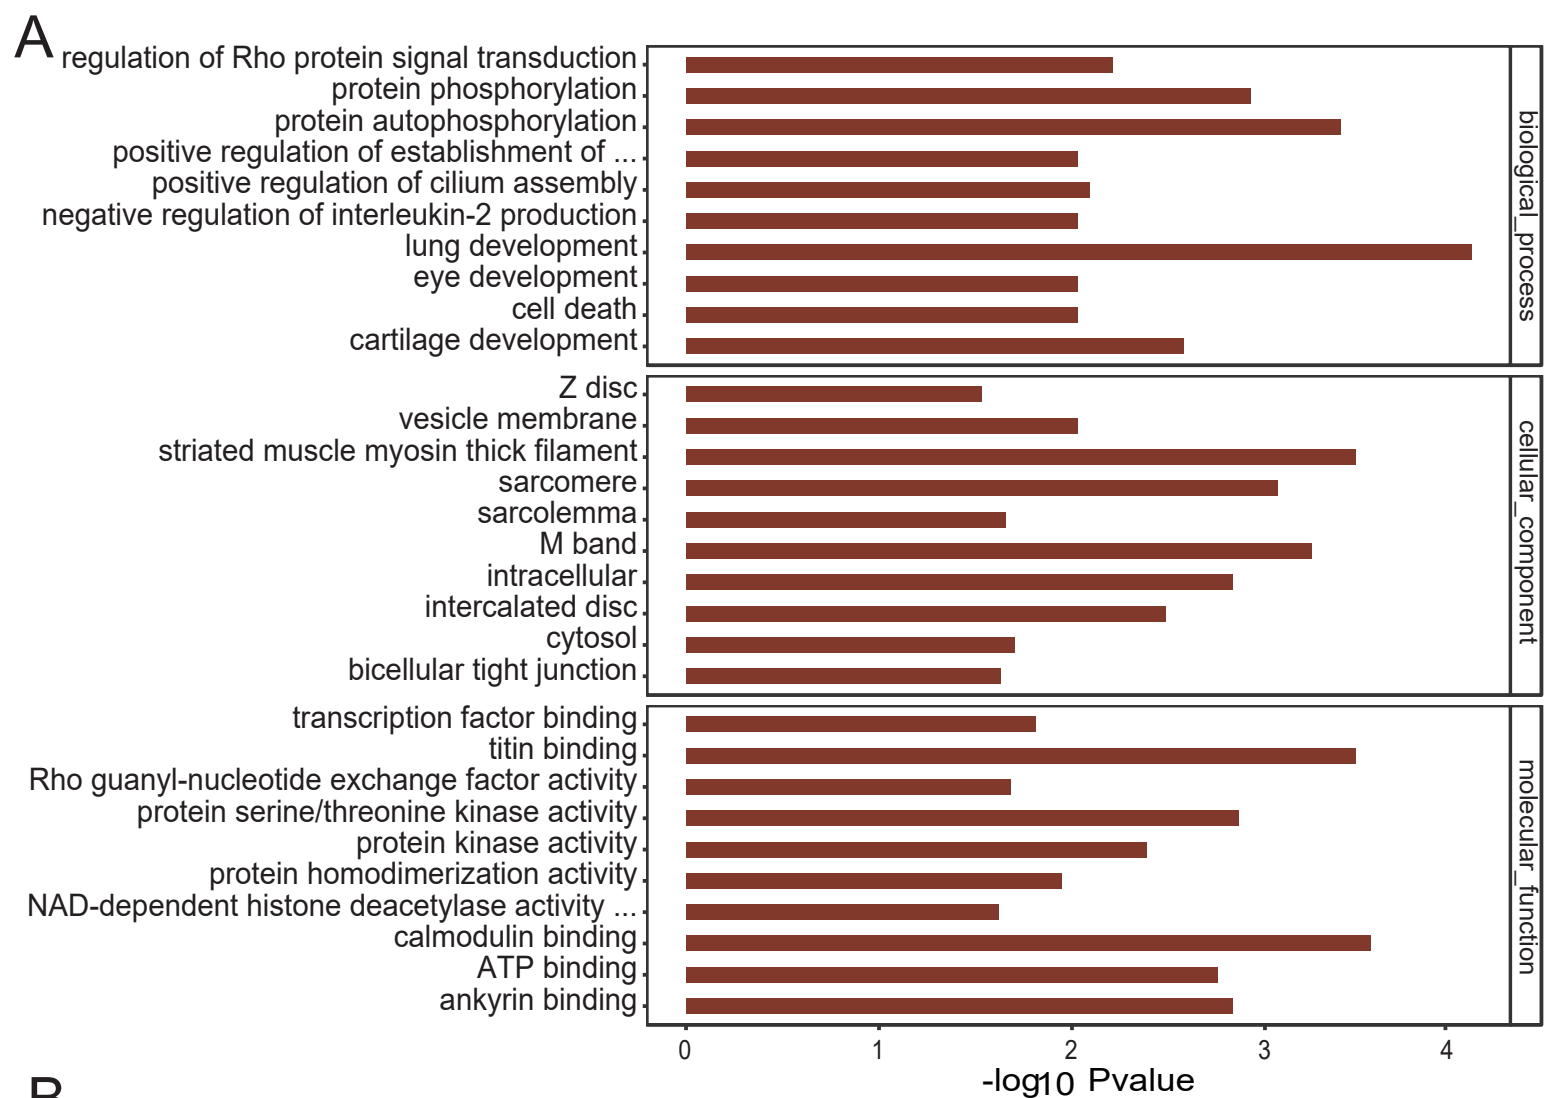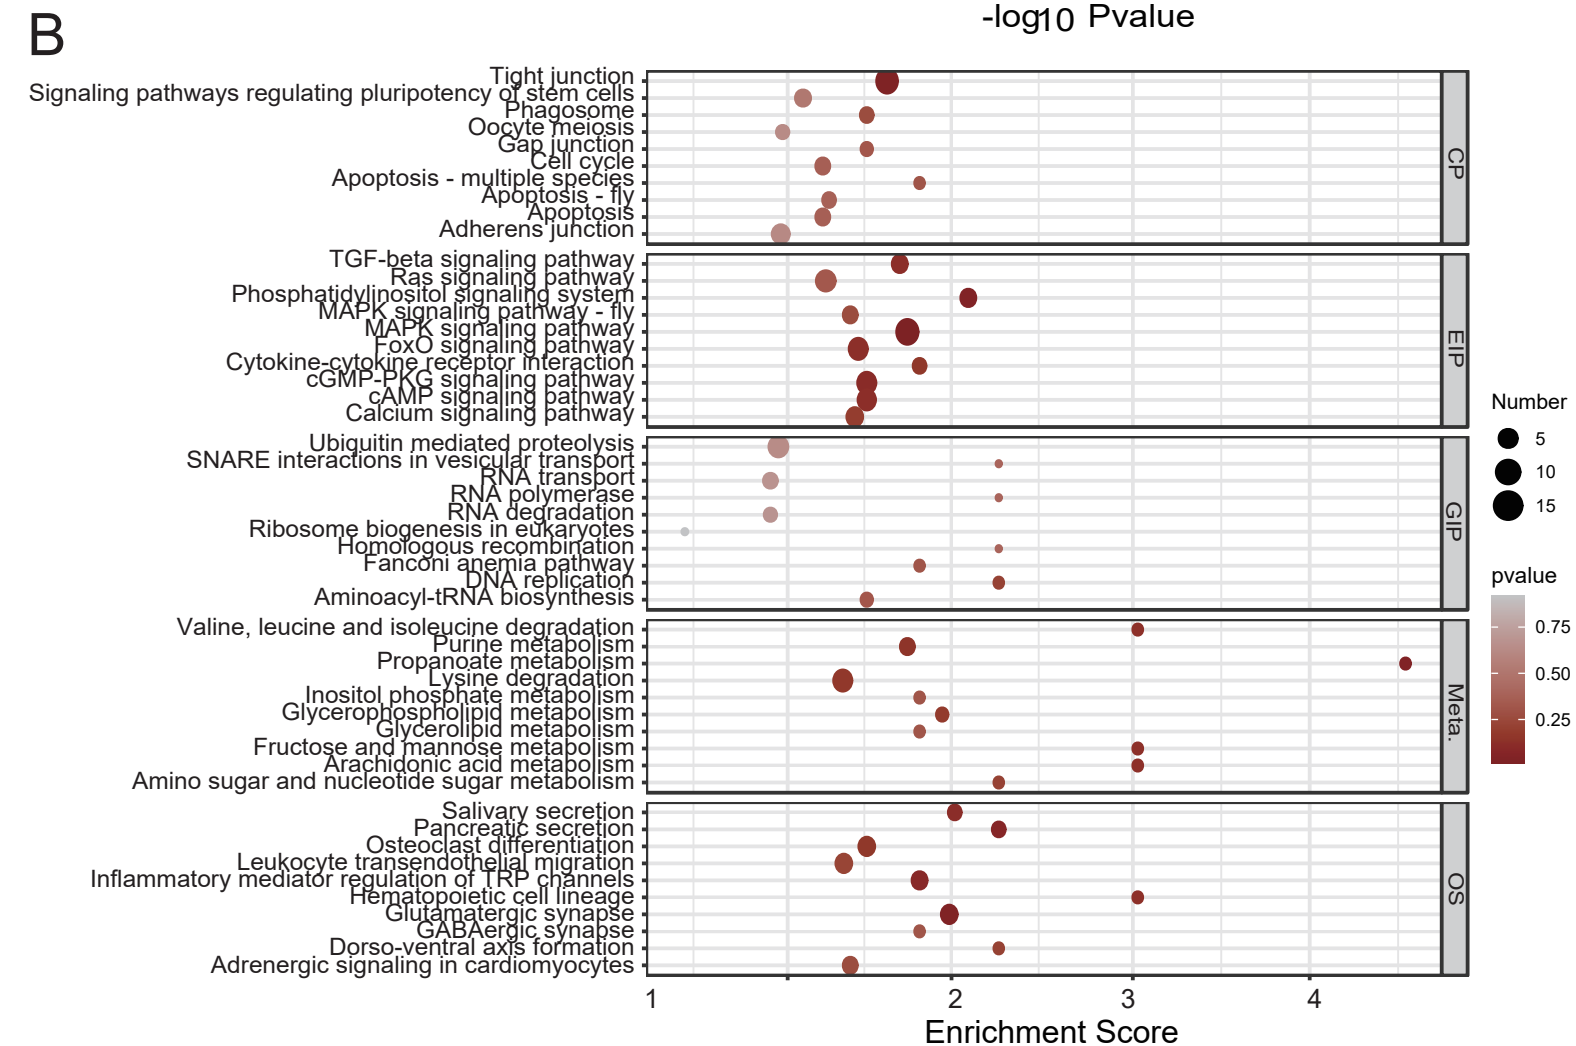

Supplement: s1 [file s1]

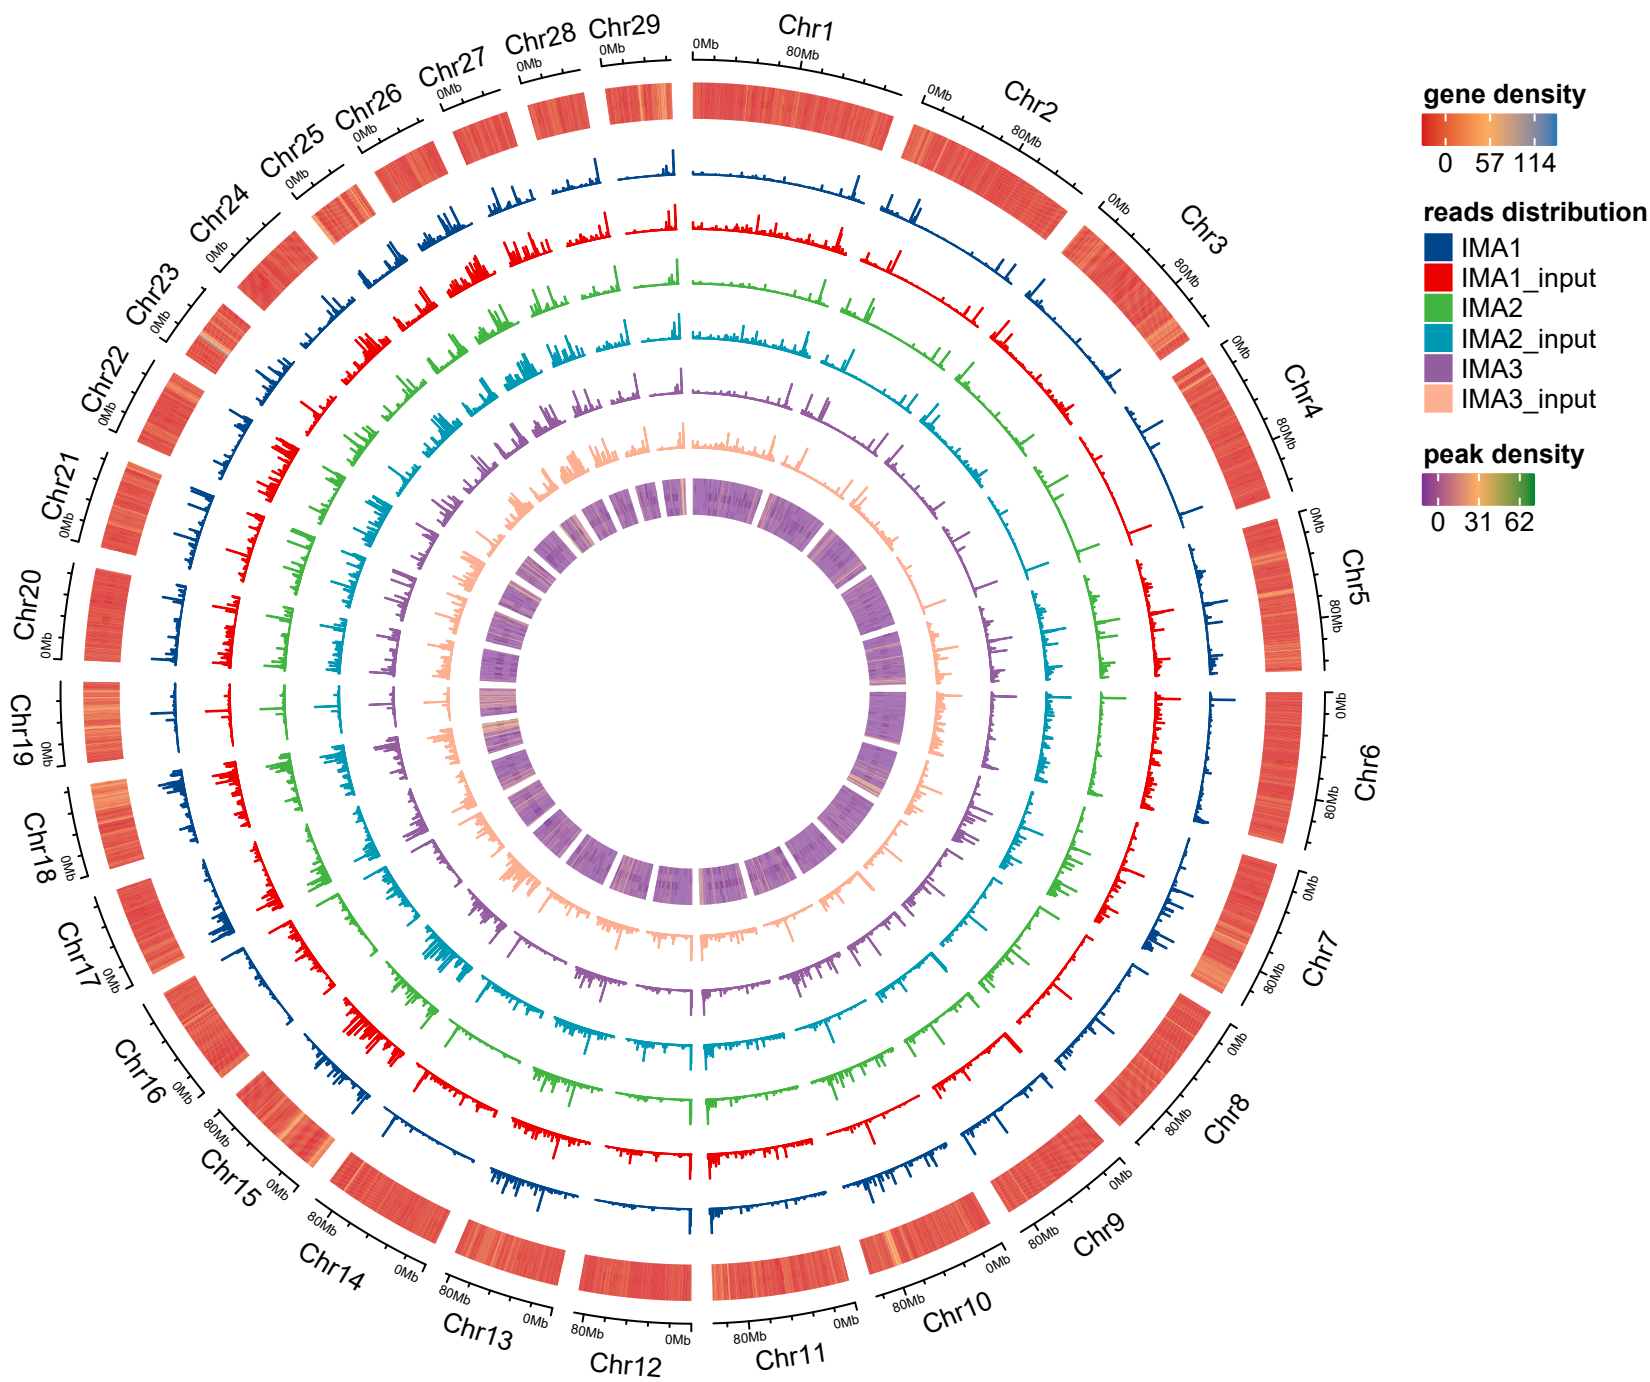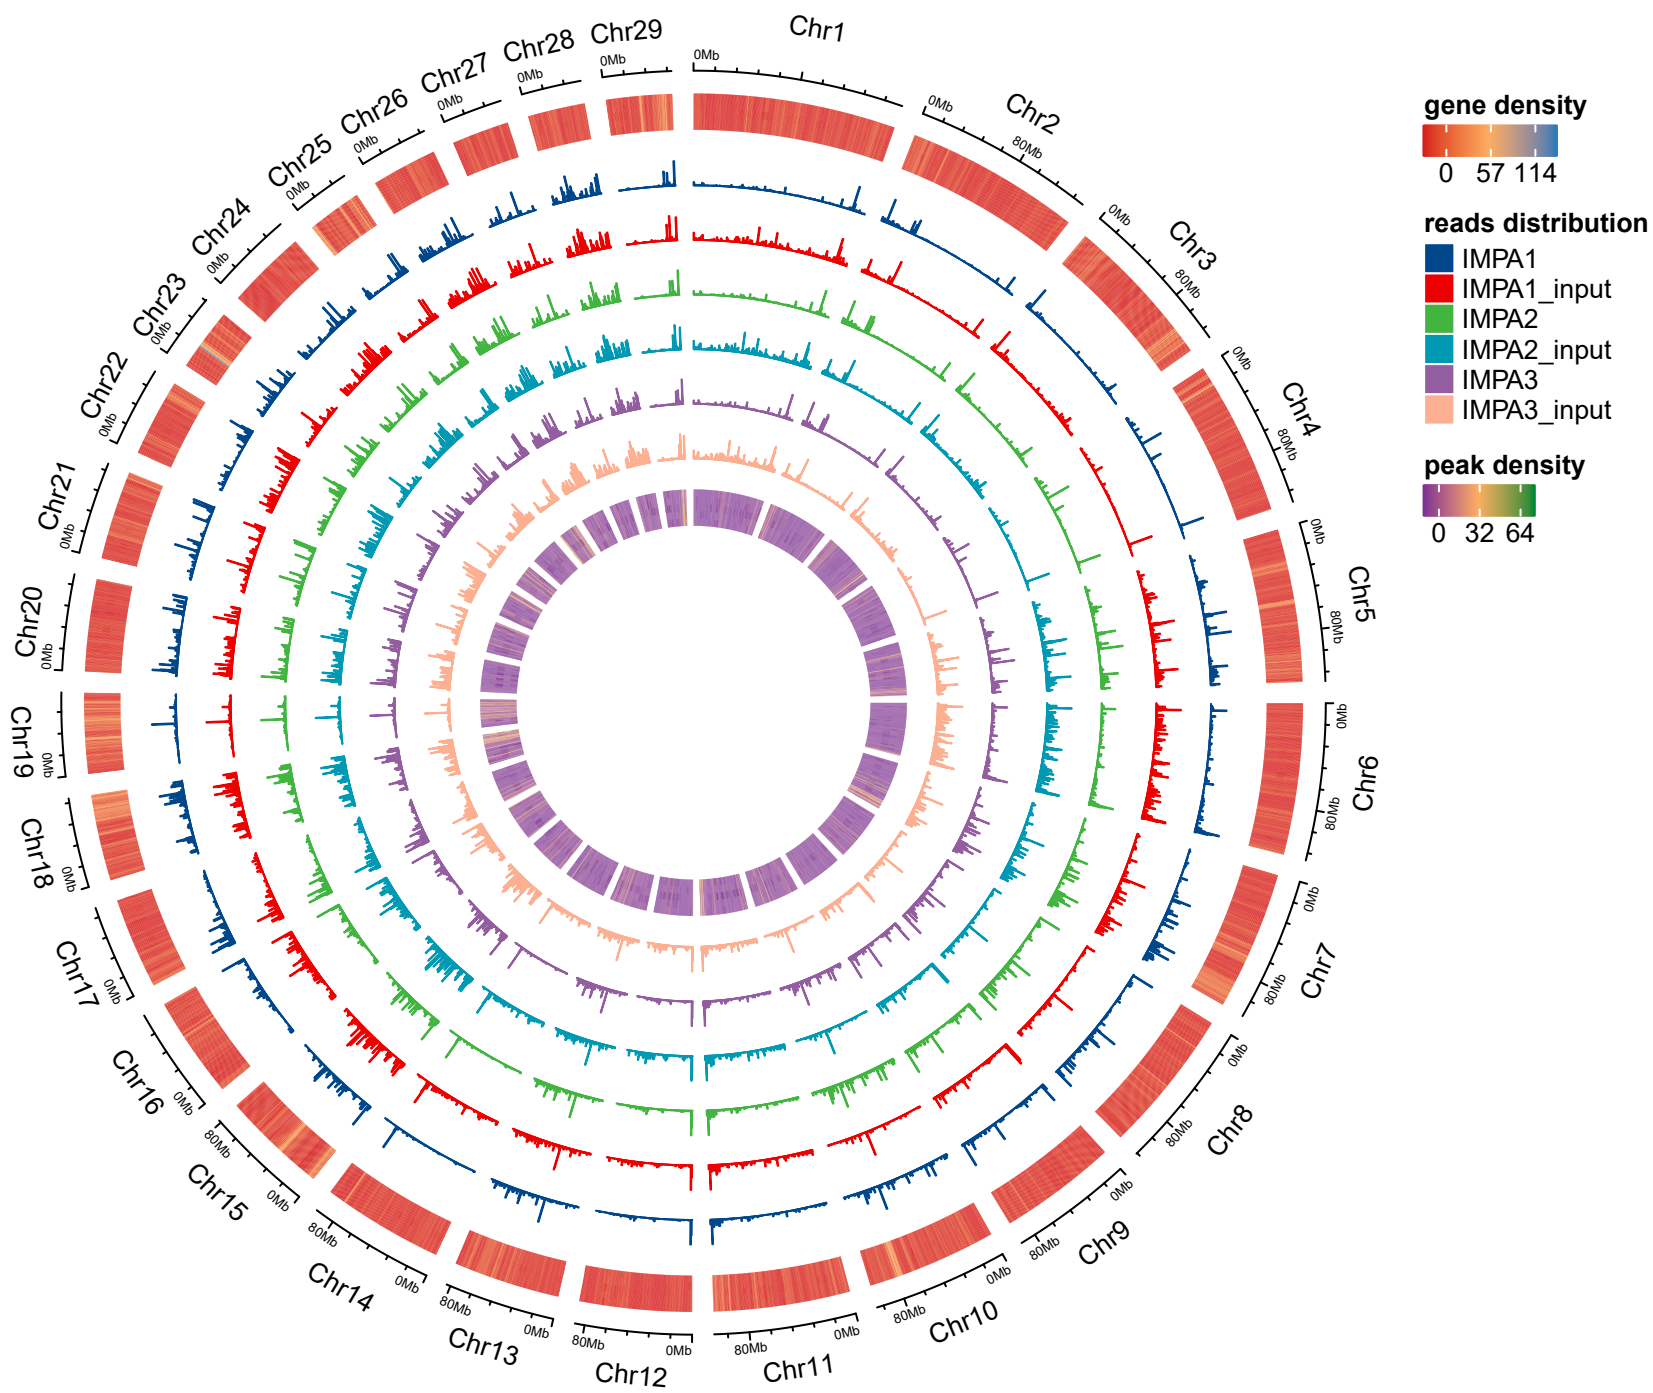

Supplement: s1 [file s1]
